# Supplementary material
Source: PubMed Central journal article supplement (PMC7877798)
Supplement: aim-olf-M207145-M20-7145_Supplement.pdf [file aim-olf-M207145-M20-7145_Supplement.pdf]

## Supplementary Material\*

Nelson KN, Baker JM, Overton E, et al. Quantification of Occupational and Community Risk Factors for SARS-CoV-2 Seropositivity Among Health Care Workers in a Large U.S. Health Care System. *Ann Intern Med.* 2021. doi:10.7326/M20-7145

*Supplement Figure. Number of Study Participants (A) and Cumulative Incidence of COVID-19 (B) by ZIP Code*

*Supplement Table 1. Details of Data Sources and Factor Descriptions*

*Supplement Table 2. Additional Descriptive Statistics for Survey Participants (n = 9610)*

*Supplement Table 3. Association of Demographic, Community, and Occupational Risk Factors With Seropositivity Incorporating Cumulative Incidence of COVID-19 by Residential ZIP Code Into Weights (n = 8582)*

*Supplement Table 4. Association of Demographic, Community, and Occupational Risk Factors With Seropositivity Limited to Participants With No Known Community Exposure to COVID-19 (n = 7887)*

\* This supplementary material was provided by the authors to give readers further details on their article. The material was reviewed but not copyedited.

**Supplement Figure. Number of study participants (A) and cumulative incidence per 10,000 of COVID-19 (B) by ZIP code <sup>a</sup>**

**A**

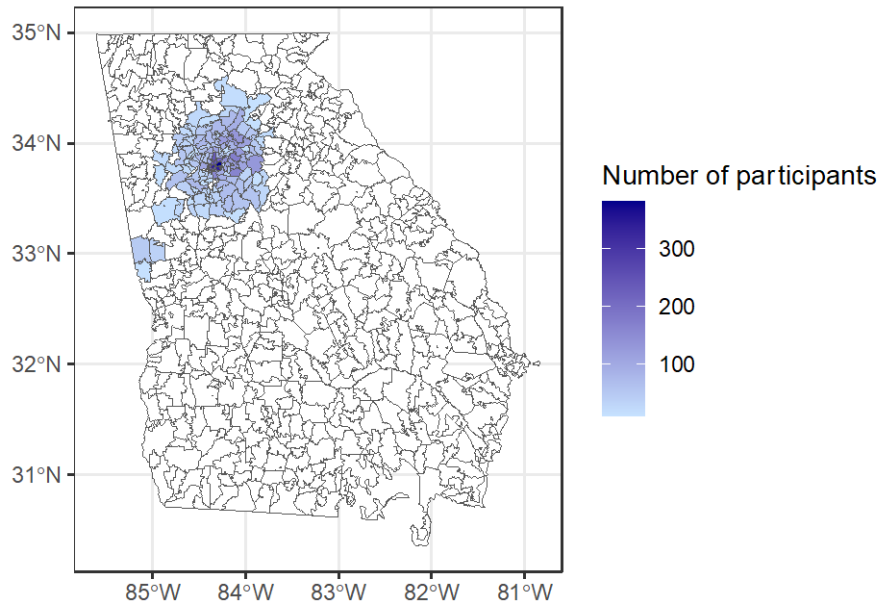

**B**

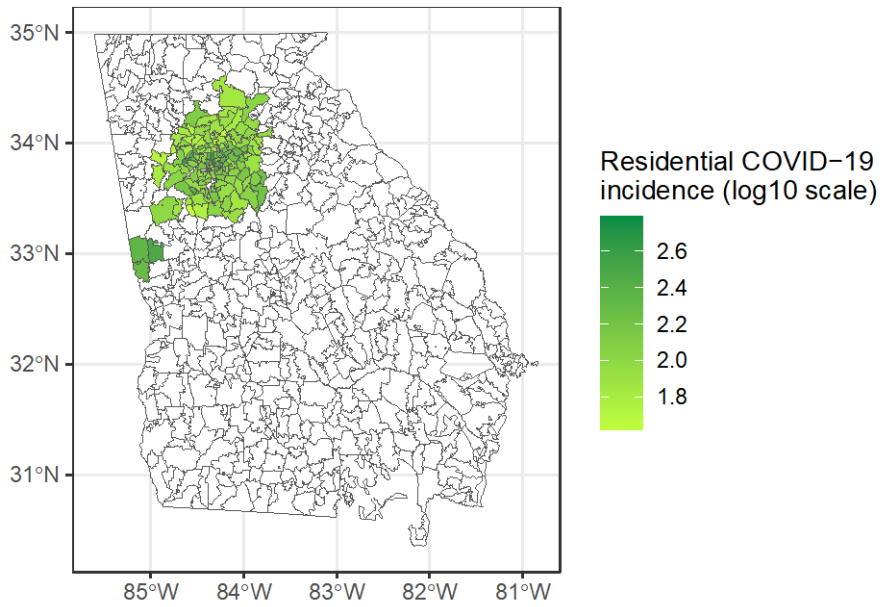

<sup>a</sup> Data for zip codes with fewer than 10 study participants are excluded from the figure.

**Supplement Table 1. Details of Data Sources and Factor Descriptions**

| <b>Factor</b>                                           | <b>Data source</b>                                                                | <b>Survey question</b>                                                                                                                                          | <b>Possible responses</b>                                                    | <b>Additional information</b>                                                                                                                                                                                                                  |
|---------------------------------------------------------|-----------------------------------------------------------------------------------|-----------------------------------------------------------------------------------------------------------------------------------------------------------------|------------------------------------------------------------------------------|------------------------------------------------------------------------------------------------------------------------------------------------------------------------------------------------------------------------------------------------|
| <b>Demographic and community factors</b>                |                                                                                   |                                                                                                                                                                 |                                                                              |                                                                                                                                                                                                                                                |
| Age group                                               | Employment records                                                                | NA                                                                                                                                                              | NA                                                                           | Categorized into deciles                                                                                                                                                                                                                       |
| Race                                                    | Employment records                                                                | NA                                                                                                                                                              | NA                                                                           | Self-reported                                                                                                                                                                                                                                  |
| Ethnicity                                               | Employment records                                                                | NA                                                                                                                                                              | NA                                                                           | Self-reported                                                                                                                                                                                                                                  |
| Contact with confirmed/suspected positive individual(s) | Survey                                                                            | Since February 1, 2020, have you had close contact (>10 minutes of face to face) with someone with confirmed or suspected COVID-19 outside of work?             | 1. Yes exposed to someone with COVID-19;<br>2. Yes;<br>3. No;<br>4. Not sure | Categorized into yes/no (not sure categorized as "no")                                                                                                                                                                                         |
| Residential COVID-19 incidence                          | Georgia Department of Public Health and employment records (residential zip code) | NA                                                                                                                                                              | NA                                                                           | Cumulative incidence of persons under investigation for COVID-19 linked with zip code data and week of serology test. Cumulative incidence two weeks prior to week of serology test was used to account for lag between infection and testing. |
| <b>Occupational factors</b>                             |                                                                                   |                                                                                                                                                                 |                                                                              |                                                                                                                                                                                                                                                |
| Caring for COVID-19 positive patient(s)                 | Survey                                                                            | While at work, did/do you provide direct patient care for any patient(s) known (confirmed) to be positive for COVID-19, regardless of location in the facility? | Yes;<br>No;<br>Not sure                                                      | Not sure categorized as "no"                                                                                                                                                                                                                   |

**Supplement Table 1. *continued***

| Factor                                                                             | Data source | Survey question                                                                                                                                                                               | Possible responses                                                                                                                                                                                                                                                                                                                                                                                                                                                                                                                                                                                                                                           | Additional information                                                                                                                                                                                                                                                                                                                                                                                                                                                                                                                                                                                                                                                                                                                                                                                                                                                                                                                                                                                         |
|------------------------------------------------------------------------------------|-------------|-----------------------------------------------------------------------------------------------------------------------------------------------------------------------------------------------|--------------------------------------------------------------------------------------------------------------------------------------------------------------------------------------------------------------------------------------------------------------------------------------------------------------------------------------------------------------------------------------------------------------------------------------------------------------------------------------------------------------------------------------------------------------------------------------------------------------------------------------------------------------|----------------------------------------------------------------------------------------------------------------------------------------------------------------------------------------------------------------------------------------------------------------------------------------------------------------------------------------------------------------------------------------------------------------------------------------------------------------------------------------------------------------------------------------------------------------------------------------------------------------------------------------------------------------------------------------------------------------------------------------------------------------------------------------------------------------------------------------------------------------------------------------------------------------------------------------------------------------------------------------------------------------|
| Caring patient(s) found to be COVID-19 positive while not on isolation precautions | Survey      | While at work, did you care for patient(s) who, while not on isolation precautions, were tested and found to be COVID-19 positive?                                                            | Yes;<br>No;<br>Not sure                                                                                                                                                                                                                                                                                                                                                                                                                                                                                                                                                                                                                                      | Not sure categorized as "no"                                                                                                                                                                                                                                                                                                                                                                                                                                                                                                                                                                                                                                                                                                                                                                                                                                                                                                                                                                                   |
| Contact with other healthcare worker found to be COVID-19 positive                 | Survey      | While at work, did you have close contact (>10 minutes face to face) to other healthcare worker(s) who were found to have COVID-19 infection during the time period you were exposed to them? | Yes;<br>No;<br>Not sure                                                                                                                                                                                                                                                                                                                                                                                                                                                                                                                                                                                                                                      | Not sure categorized as "no"                                                                                                                                                                                                                                                                                                                                                                                                                                                                                                                                                                                                                                                                                                                                                                                                                                                                                                                                                                                   |
| Workplace location                                                                 | Survey      | Where do/did you spend most time at work in the hospital during the COVID-19 pandemic? (may check more than one if you split your time equally)                                               | <ol style="list-style-type: none"> <li>1. Emergency department;</li> <li>2. Medical-surgical focused on COVID-19 patients;</li> <li>3. Medical-surgical-not focused on COVID-19 patients;</li> <li>4. ICU focused on COVID-19 patients;</li> <li>5. ICU-not focused on COVID-19 patients</li> <li>6. Clinic focused on COVID-19 patients;</li> <li>7. Clinic not focused on COVID-19 patients;</li> <li>8. OR or peri-operative area;</li> <li>9. Other procedure area;</li> <li>10. Other hospital area;</li> <li>11. Non-clinical area of hospital/clinic</li> <li>12. Not in hospital or clinic;</li> <li>13. Work from home: worked from home</li> </ol> | <p>Hierarchy to classify participant into one category (even if multiple job locations were selected) in the order below. Order based on anticipated encounters with COVID-19 positive patients.</p> <ol style="list-style-type: none"> <li>1. Emergency department: emergency department</li> <li>2. COVID-19 focused: medical-surgical focused on COVID-19 patients; ICU focused on COVID-19 patients; clinic focused on COVID-19 patients</li> <li>3. Inpatient not COVID-19 focused: medical-surgical-not focused on COVID-19 patients; ICU-not focused on COVID-19 patients</li> <li>4. Outpatient clinical: clinic not focused on COVID-19 patients</li> <li>5. OR/procedure: OR or peri-operative area; other procedure area</li> <li>6. Other hospital area: other hospital area</li> <li>7. No patient contact: non-clinical area of hospital/clinic; not in hospital or clinic</li> <li>8. Work from home: worked from home</li> <li>9. Not specified: no job location selected in survey</li> </ol> |

**Supplement Table 1. *continued***

| Factor         | Data source | Survey question                                                                                                                                                | Possible responses                                                                                                                                                                                                                                                                                                                          | Additional information |
|----------------|-------------|----------------------------------------------------------------------------------------------------------------------------------------------------------------|---------------------------------------------------------------------------------------------------------------------------------------------------------------------------------------------------------------------------------------------------------------------------------------------------------------------------------------------|------------------------|
| Workplace role | Survey      | What is your job role?                                                                                                                                         | <ol style="list-style-type: none"> <li>1. Advanced practice provider</li> <li>2. Environmental services</li> <li>3. Nurse</li> <li>4. Nurse technician</li> <li>5. Other direct care provider</li> <li>6. Other with no patient contact</li> <li>7. Physician</li> <li>8. Radiology technician</li> <li>9. Respiratory therapist</li> </ol> |                        |
| PPE use        | Survey      | While at work, please assess your use of workplace recommended personal protective equipment (PPE) while caring for patients with suspected or known COVID-19. | <ol style="list-style-type: none"> <li>1. Had numerous situations where I was not using recommended PPE;</li> <li>2. Wore PPE but unsure if I was always using properly;</li> <li>3. Always used recommended PPE and paid close attention to donning and doffing</li> </ol>                                                                 |                        |

NA: not applicable; ICU: intensive care unit; OR: operating room; PPE: personal protective equipment

**Supplement Table 2. Additional Descriptive Statistics for Survey Participants (n = 9610)**

| <b>Factor</b>                                                                              | <b>Total sample<br/>N. (%)</b> | <b>Seropositive<br/>N. (%)</b> |
|--------------------------------------------------------------------------------------------|--------------------------------|--------------------------------|
| <b>SARS-CoV-2 testing</b>                                                                  |                                |                                |
| Week of serology testing                                                                   |                                |                                |
| 4/19/2020                                                                                  | 852 (8.9)                      | 40 (4.7)                       |
| 4/26/2020                                                                                  | 1060 (11.0)                    | 40 (3.8)                       |
| 5/3/2020                                                                                   | 874 (9.1)                      | 52 (5.9)                       |
| 5/10/2020                                                                                  | 1954 (20.3)                    | 126 (6.4)                      |
| 5/17/2020                                                                                  | 2270 (23.6)                    | 172 (7.6)                      |
| 5/24/2020                                                                                  | 1721 (17.9)                    | 57 (3.3)                       |
| 5/31/2020                                                                                  | 569 (5.9)                      | 52 (9.1)                       |
| 6/7/20 - 6/21/20                                                                           | 310 (3.2)                      | 16 (5.2)                       |
| <b>Prior illness (fever or respiratory symptoms) since February 1, 2020 &amp; symptoms</b> |                                |                                |
| Prior illness, no COVID-19 test                                                            |                                |                                |
| No                                                                                         | 7969 (82.9)                    | 449 (5.6)                      |
| Yes                                                                                        | 1641 (17.1)                    | 106 (6.5)                      |
| Prior illness, negative COVID-19 test                                                      |                                |                                |
| No                                                                                         | 8882 (92.4)                    | 511 (5.8)                      |
| Yes                                                                                        | 728 (7.6)                      | 44 (6.0)                       |
| Previous positive COVID-19 test                                                            |                                |                                |
| No                                                                                         | 9477 (98.6)                    | 431 (4.5)                      |
| Yes                                                                                        | 133 (1.4)                      | 124 (93.2)                     |
| Previous illness (regardless of COVID-19 testing status)                                   |                                |                                |
| No                                                                                         | 7191 (74.8)                    | 298 (4.1)                      |
| Yes                                                                                        | 2419 (25.2)                    | 257 (10.6)                     |
| Any symptoms                                                                               |                                |                                |
| No                                                                                         | 129 (1.3)                      | 12 (9.3)                       |
| Yes                                                                                        | 2290 (23.8)                    | 245 (10.7)                     |
| Not applicable                                                                             | 7191 (74.8)                    | 298 (4.1)                      |
| <b>Detailed job location</b>                                                               |                                |                                |
| Job location (dichotomous)                                                                 |                                |                                |
| Medical-surgical- focused on COVID-19 patients                                             | 1160 (12.1)                    | 83 (7.2)                       |
| Medical-surgical- not focused on COVID-19 patients                                         | 2024 (21.1)                    | 120 (5.9)                      |
| ICU- focused on COVID-19 patients                                                          | 1320 (13.7)                    | 87 (6.6)                       |
| ICU- not focused on COVID-19 patients                                                      | 1445 (15.0)                    | 99 (6.9)                       |
| OR or peri-operative area                                                                  | 877 (9.1)                      | 51 (5.8)                       |
| Other procedure area                                                                       | 609 (6.3)                      | 40 (6.6)                       |
| Emergency department                                                                       | 1007 (10.5)                    | 67 (6.7)                       |
| Other hospital area                                                                        | 1716 (17.9)                    | 102 (5.9)                      |
| Clinic- focused on COVID-19 patients                                                       | 267 (2.8)                      | 16 (6.0)                       |
| Clinic- not focused on COVID-19 patients                                                   | 2190 (22.8)                    | 115 (5.3)                      |
| Non-clinical area of hospital or clinic                                                    | 1582 (16.5)                    | 84 (5.3)                       |
| Not in hospital or clinic                                                                  | 239 (2.5)                      | 12 (5.0)                       |
| Work from home                                                                             | 895 (9.3)                      | 42 (4.7)                       |

ICU: intensive care unit; OR: operating room

**Supplement Table 3. Association of Demographic, Community, and Occupational Risk Factors With Seropositivity Incorporating Cumulative Incidence of COVID-19 by Residential ZIP Code Into Weights (*n* = 8582)**

| <b>Factor</b>                                                                                 | <b>Adjusted<br/>(weighted, to<br/>adjust for<br/>participation)<sup>a</sup><br/>OR (95% CI)</b> |
|-----------------------------------------------------------------------------------------------|-------------------------------------------------------------------------------------------------|
| <b>Demographic and community factors</b>                                                      |                                                                                                 |
| Age group                                                                                     |                                                                                                 |
| 60+                                                                                           | 1.0 (ref)                                                                                       |
| 50-59                                                                                         | 0.9 (0.5, 1.4)                                                                                  |
| 40-49                                                                                         | 1.1 (0.7, 1.8)                                                                                  |
| 30-39                                                                                         | 1.1 (0.7, 1.7)                                                                                  |
| <30                                                                                           | 1.2 (0.7, 1.9)                                                                                  |
| Sex                                                                                           |                                                                                                 |
| Female                                                                                        | 1.0 (ref)                                                                                       |
| Male                                                                                          | 1.2 (0.9, 1.7)                                                                                  |
| Race                                                                                          |                                                                                                 |
| White                                                                                         | 1.0 (ref)                                                                                       |
| Black                                                                                         | 2.0 (1.6, 2.6)                                                                                  |
| Asian                                                                                         | 1.3 (0.9, 1.8)                                                                                  |
| Multiracial                                                                                   | 1.8 (0.8, 3.9)                                                                                  |
| American Indian/Alaska Native                                                                 | 2.7 (0.5, 14.2)                                                                                 |
| Native Hawaiian/Pacific Islander                                                              | -- <sup>c</sup>                                                                                 |
| Not specified                                                                                 | --                                                                                              |
| Ethnicity                                                                                     |                                                                                                 |
| Non-Hispanic                                                                                  | 1.0 (ref)                                                                                       |
| Hispanic                                                                                      | 1.0 (0.5, 1.9)                                                                                  |
| Community contact with<br>confirmed/suspected positive<br>individual(s)                       |                                                                                                 |
| No                                                                                            | 1.0 (ref)                                                                                       |
| Yes                                                                                           | 2.2 (1.5, 3.3)                                                                                  |
| Residential COVID-19 incidence <sup>b</sup>                                                   | 1.6 (1.1, 2.4)                                                                                  |
| <b>Occupational factors</b>                                                                   |                                                                                                 |
| Caring for COVID-19 positive patient(s)                                                       |                                                                                                 |
| No                                                                                            | 1.0 (ref)                                                                                       |
| Yes                                                                                           | 1.1 (0.7, 1.6)                                                                                  |
| Caring for patient(s) found to be COVID-<br>19 positive while not on isolation<br>precautions |                                                                                                 |
| No                                                                                            | 1.0 (ref)                                                                                       |
| Yes                                                                                           | 1.0 (0.6, 1.4)                                                                                  |



**Supplement Table 3. *continued***

| <b>Factor</b>                                                         | <b>Adjusted<br/>(weighted, to<br/>adjust for<br/>participation)<sup>a</sup><br/>OR (95% CI)</b> |
|-----------------------------------------------------------------------|-------------------------------------------------------------------------------------------------|
| Contact with other healthcare worker<br>found to be COVID-19 positive |                                                                                                 |
| No                                                                    | 1.0 (ref)                                                                                       |
| Yes                                                                   | 1.4 (1.0, 1.9)                                                                                  |
| Workplace location                                                    |                                                                                                 |
| No patient contact                                                    | 1.0 (ref)                                                                                       |
| Work from home                                                        | 1.5 (0.7, 3.6)                                                                                  |
| Other hospital area                                                   | 1.2 (0.7, 2.2)                                                                                  |
| OR/procedure                                                          | 1.0 (0.5, 1.9)                                                                                  |
| Outpatient clinical                                                   | 1.4 (0.8, 2.4)                                                                                  |
| Inpatient not COVID-19 focused                                        | 1.2 (0.7, 2.1)                                                                                  |
| COVID-19 focused                                                      | 1.2 (0.7, 2.3)                                                                                  |
| Emergency department                                                  | 1.1 (0.6, 2.1)                                                                                  |
| Not specified                                                         | --                                                                                              |
| Workplace role                                                        |                                                                                                 |
| Other with no patient contact                                         | 1.0 (ref)                                                                                       |
| Nurse                                                                 | 1.0 (0.6, 1.5)                                                                                  |
| Physician                                                             | 1.2 (0.7, 2.1)                                                                                  |
| Other direct care provider                                            | 1.3 (0.8, 2.1)                                                                                  |
| Advanced practice provider                                            | 0.8 (0.4, 1.6)                                                                                  |
| Nurse technician                                                      | 1.1 (0.5, 2.1)                                                                                  |
| Radiology technician                                                  | 1.4 (0.6, 3.2)                                                                                  |
| Respiratory therapist                                                 | 0.9 (0.2, 3.0)                                                                                  |
| Environmental services                                                | 2.5 (0.6, 9.5)                                                                                  |
| Not specified                                                         | --                                                                                              |
| Personal protective equipment use                                     |                                                                                                 |
| As recommended                                                        | 1.0 (ref)                                                                                       |
| Not as recommended                                                    | 0.8 (0.4, 1.8)                                                                                  |
| Unsure                                                                | 0.5 (0.3, 1.0)                                                                                  |
| Not specified/not applicable <sup>d</sup>                             | 1.1 (0.8, 1.5)                                                                                  |

<sup>a</sup> Adjusted for all other factors shown in table and accounting for participation bias using inverse probability of participation weighting for age group, race, sex, and cumulative incidence of COVID-19 by residential zip code. Cumulative incidence of COVID-19 was divided by tertiles to assign participants into one of three categories.

<sup>b</sup> The base-10 logarithm of cumulative COVID-19 incidence in a participant's zip code two weeks prior to the date they were tested.

<sup>c</sup> Odds ratio suppressed due to small sample size

<sup>d</sup> The survey question about personal protective equipment use applied only to those in the clinical setting while caring for patients with suspected or known COVID-19. This question was therefore not applicable to some healthcare workers.

OR: odds ratio; CI: confidence interval, ref: reference group

**Supplement Table 4. Association of Demographic, Community, and Occupational Risk Factors With Seropositivity Limited to Participants With No Known Community Exposure to COVID-19 (*n* = 7887)**

| <b>Factor</b>                                                                          | <b>Adjusted<br/>(weighted, to<br/>adjust for<br/>participation)<sup>a</sup><br/>OR (95% CI)</b> |
|----------------------------------------------------------------------------------------|-------------------------------------------------------------------------------------------------|
| <b>Demographic and community factors</b>                                               |                                                                                                 |
| Age group                                                                              |                                                                                                 |
| 60+                                                                                    | 1.0 (ref)                                                                                       |
| 50-59                                                                                  | 0.8 (0.6, 1.3)                                                                                  |
| 40-49                                                                                  | 1.1 (0.7, 1.6)                                                                                  |
| 30-39                                                                                  | 1.0 (0.7, 1.6)                                                                                  |
| <30                                                                                    | 1.4 (0.9, 2.1)                                                                                  |
| Sex                                                                                    |                                                                                                 |
| Female                                                                                 | 1.0 (ref)                                                                                       |
| Male                                                                                   | 1.3 (1.0, 1.8)                                                                                  |
| Race                                                                                   |                                                                                                 |
| White                                                                                  | 1.0 (ref)                                                                                       |
| Black                                                                                  | 1.9 (1.5, 2.5)                                                                                  |
| Asian                                                                                  | 1.2 (0.8, 1.7)                                                                                  |
| Multiracial                                                                            | 1.8 (0.9, 4.0)                                                                                  |
| American Indian/Alaska Native                                                          | 1.5 (0.3, 6.9)                                                                                  |
| Native Hawaiian/Pacific Islander                                                       | -- <sup>c</sup>                                                                                 |
| Not specified                                                                          | --                                                                                              |
| Ethnicity                                                                              |                                                                                                 |
| Non-Hispanic                                                                           | 1.0 (ref)                                                                                       |
| Hispanic                                                                               | 0.7 (0.3, 1.3)                                                                                  |
| Residential COVID-19 incidence <sup>b</sup>                                            | 1.6 (1.0, 2.3)                                                                                  |
| <b>Occupational factors</b>                                                            |                                                                                                 |
| Caring for COVID-19 positive patient(s)                                                |                                                                                                 |
| No                                                                                     | 1.0 (ref)                                                                                       |
| Yes                                                                                    | 0.8 (0.6, 1.1)                                                                                  |
| Caring for patient(s) found to be COVID-19 positive while not on isolation precautions |                                                                                                 |
| No                                                                                     | 1.0 (ref)                                                                                       |
| Yes                                                                                    | 1.2 (0.9, 1.7)                                                                                  |

**Supplement Table 4. continued**

| Factor                                                                | Adjusted<br>(weighted, to<br>adjust for<br>participation) <sup>a</sup><br>OR (95% CI) |
|-----------------------------------------------------------------------|---------------------------------------------------------------------------------------|
| Contact with other healthcare worker<br>found to be COVID-19 positive |                                                                                       |
| No                                                                    | 1.0 (ref)                                                                             |
| Yes                                                                   | 1.3 (1.0, 1.8)                                                                        |
| Workplace location                                                    |                                                                                       |
| No patient contact                                                    | 1.0 (ref)                                                                             |
| Work from home                                                        | 1.1 (0.5, 2.5)                                                                        |
| Other hospital area                                                   | 1.5 (0.9, 2.5)                                                                        |
| OR/procedure                                                          | 1.1 (0.6, 1.9)                                                                        |
| Outpatient clinical                                                   | 1.4 (0.8, 2.4)                                                                        |
| Inpatient not COVID-19 focused                                        | 1.3 (0.7, 2.2)                                                                        |
| COVID-19 focused                                                      | 1.9 (1.1, 3.3)                                                                        |
| Emergency department                                                  | 1.8 (1.0, 3.2)                                                                        |
| Not specified                                                         | --                                                                                    |
| Workplace role                                                        |                                                                                       |
| Other with no patient contact                                         | 1.0 (ref)                                                                             |
| Nurse                                                                 | 1.0 (0.7, 1.5)                                                                        |
| Physician                                                             | 1.0 (0.6, 1.5)                                                                        |
| Other direct care provider                                            | 1.0 (0.6, 1.5)                                                                        |
| Advanced practice provider                                            | 0.9 (0.5, 1.6)                                                                        |
| Nurse technician                                                      | 1.0 (0.5, 1.9)                                                                        |
| Radiology technician                                                  | 1.4 (0.7, 2.7)                                                                        |
| Respiratory therapist                                                 | 1.0 (0.4, 2.9)                                                                        |
| Environmental services                                                | 0.6 (0.1, 2.8)                                                                        |
| Not specified                                                         | --                                                                                    |
| Personal protective equipment use                                     |                                                                                       |
| As recommended                                                        | 1.0 (ref)                                                                             |
| Not as recommended                                                    | 1.0 (0.4, 2.2)                                                                        |
| Unsure                                                                | 0.8 (0.5, 1.4)                                                                        |
| Not specified/not applicable <sup>d</sup>                             | 1.0 (0.8, 1.4)                                                                        |

<sup>a</sup> Adjusted for all other factors shown in table and accounting for participation bias using inverse probability of participation weighting for age group, race, and sex.

<sup>b</sup> The base-10 logarithm of cumulative COVID-19 incidence in a participant's zip code two weeks prior to the date they were tested.

<sup>c</sup> Odds ratio suppressed due to small sample size

<sup>d</sup> The survey question about personal protective equipment use applied only to those in the clinical setting while caring for patients with suspected or known COVID-19. This question was therefore not applicable to some healthcare workers.

OR: odds ratio; CI: confidence interval, ref: reference group
